# Supplementary material for: Innervation of an Ultrasound-Mediated PVDF-TrFE Scaffold for Skin-Tissue Engineering
Source: MDPI journal article supplement (doi:10.3390/biomimetics9010002), 2023-12-20
Supplement: s1 [file s1]

# **Innervation of an Ultrasound-Mediated PVDF-TrFE Scaffold for Skin-Tissue Engineering**

Jennifer A. Westphal <sup>1</sup>, Andrew E. Bryan <sup>2</sup>, Maksym Krutko <sup>1</sup>, Leyla Esfandiari <sup>1,3,4</sup>, Stacey C.

Schutte <sup>1</sup> and Greg M. Harris <sup>1,2,5,\*</sup>

<sup>1</sup> Department of Biomedical Engineering, University of Cincinnati, Cincinnati, OH 45221, USA

<sup>2</sup> Department of Chemical and Environmental Engineering, University of Cincinnati,  
Cincinnati, OH 45221, USA

<sup>3</sup> Department of Environmental and Public Health Sciences, University of Cincinnati,  
Cincinnati, OH 45267, USA

<sup>4</sup> Department of Electrical and Computer Science, University of Cincinnati, OH 45221, USA

<sup>5</sup> Neuroscience Graduate Program, University of Cincinnati College of Medicine,  
Cincinnati, OH 45221, USA

\* Correspondence: gregory.harris@uc.edu; Tel.: +1-(513)-556-4167; Fax: (513)-556-3473

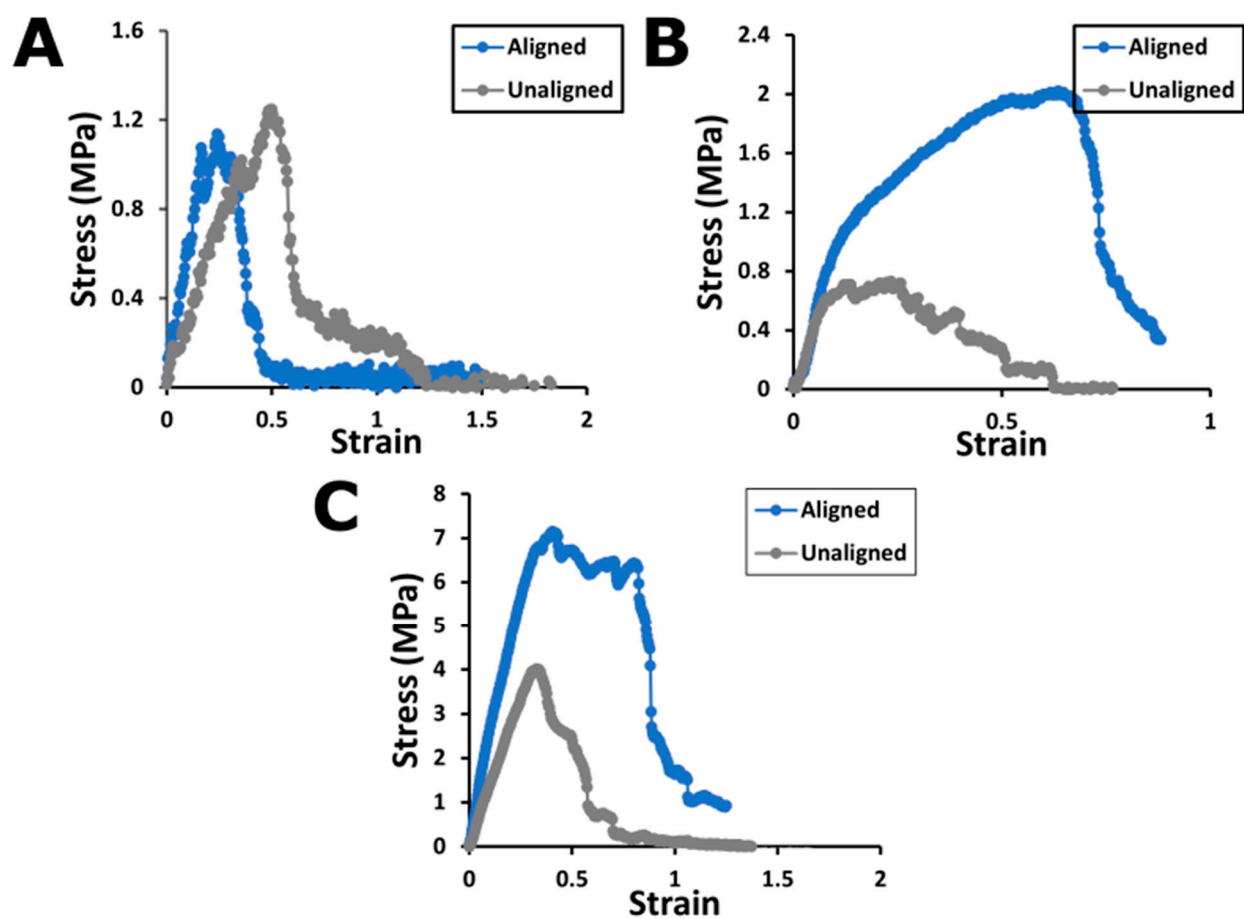

**Figure S1.** Representative stress-strain curves from one unique aligned and unaligned PVDF-TrFE sample scaffold of A) 1-, B) 2-, and C) 3-hour fabrication times.

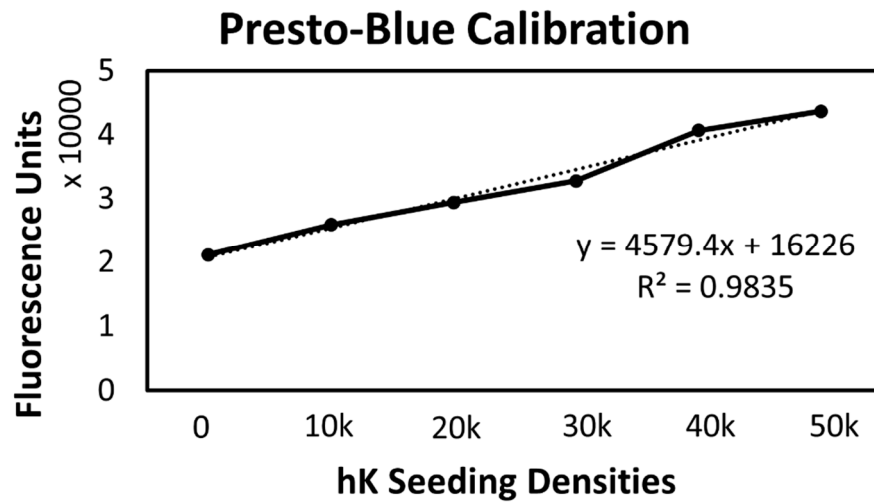

**Figure S2.** Presto-Blue calibration curve generated from relative fluorescence units of human keratinocytes seeded at densities ranging from 0 to 50,000 cells/well.

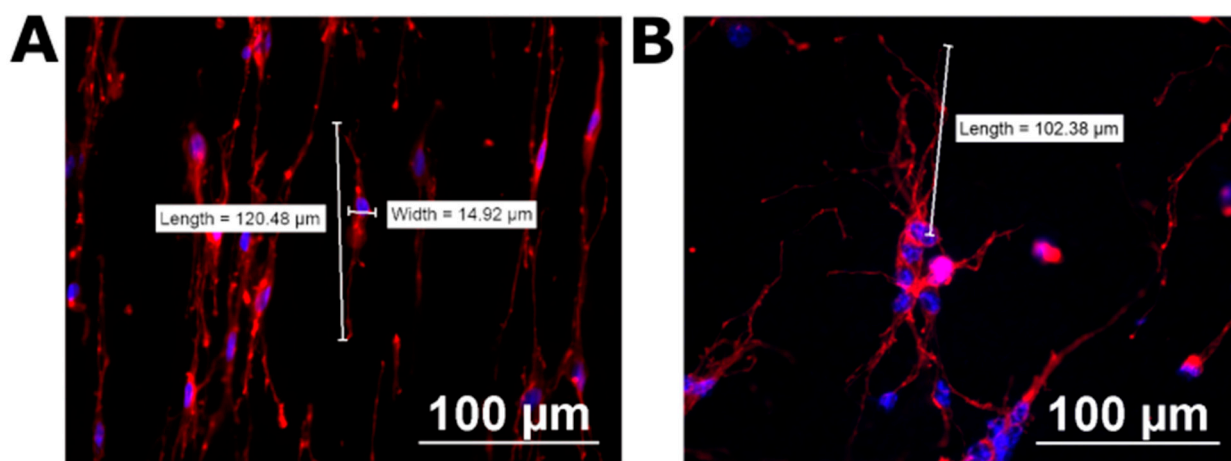

**Figure S3.** Representative immunofluorescence images showing cell measurements taken. A) Schwann cell length and width measurements for aspect ratio calculations and B) neurite length measured from center of the nearest nuclei. Neurites  $<20\ \mu\text{m}$  excluded.
